# Supplementary material for: Red and Processed Meat and Mortality in a Low Meat Intake Population
Source: PubMed Central journal article supplement (PMC6470727; doi:10.3390/nu11030622), 2019-03-14
Supplement: nutrients-11-00622-s001.pdf [file nutrients-11-00622-s001.pdf]

## Supplementary Materials

### Red and processed meat and mortality in a low-meat-intake population

Saeed Mastour Alshahrani; Gary E. Fraser; Joan Sabaté; Raymond Knutsen; David Shavlik; Andrew Mashchak; Jan Irene Lloren; Michael J. Orlich

#### CONTENTS:

**Table S1.** The association between red and processed meat intake and all-cause, cardiovascular and cancer mortality among women.

**Table S2.** The association between red and processed meat intake and all-cause, cardiovascular and cancer mortality among men.

**Table S3.** The association between red and processed meat intake and all-cause, cardiovascular and cancer mortality among Blacks.

**Table S4.** The association between red and processed meat intake and all-cause, cardiovascular and cancer mortality among non-Blacks.

**Table S5.** The association between red and processed meat intake and all-cause, cardiovascular and cancer mortality among participants who never smoked.

**Figure S1.** Dose-response relationships of red and processed meats with the risk of all-cause, CVD and cancer mortality in the AHS-2 cohort.

**Table S1. The association between red and processed meat intake and all-cause, cardiovascular and cancer mortality among women (N=47,389) <sup>a</sup>**

|                            | Unprocessed red meat intake (g/d) <sup>b</sup> |                                  |                  |                  |                  |        | P-trend          | 90 <sup>th</sup> vs 0 <sup>d</sup> |
|----------------------------|------------------------------------------------|----------------------------------|------------------|------------------|------------------|--------|------------------|------------------------------------|
|                            | Zero intake                                    | Quartiles of intake <sup>c</sup> |                  |                  |                  |        |                  |                                    |
|                            | 0                                              | Q1                               | Q2               | Q3               | Q4               |        |                  |                                    |
| No. of participants        | 31,124                                         | 4,071                            | 4,078            | 4,056            | 4,060            |        |                  |                                    |
| <b>All-cause mortality</b> |                                                |                                  |                  |                  |                  |        |                  |                                    |
| No. of deaths (N=4,870)    | 3,362                                          | 422                              | 400              | 341              | 345              |        |                  |                                    |
| Model 1                    | 1.00                                           | 1.11 (1.00–1.24)                 | 1.26 (1.14–1.41) | 1.38 (1.23–1.55) | 1.57 (1.40–1.76) | <.0001 | 1.53 (1.40–1.67) |                                    |
| Model 2                    | 1.00                                           | 1.07 (0.95–1.20)                 | 1.17 (1.04–1.31) | 1.23 (1.09–1.39) | 1.32 (1.17–1.50) | <.0001 | 1.29 (1.16–1.43) |                                    |
| Model 3                    | 1.00                                           | 1.03 (0.92–1.17)                 | 1.11 (0.98–1.26) | 1.14 (0.99–1.31) | 1.20 (1.04–1.38) | .004   | 1.17 (1.03–1.33) |                                    |
| <b>CVD-mortality</b>       |                                                |                                  |                  |                  |                  |        |                  |                                    |
| No. of deaths (N=1,617)    | 1,143                                          | 137                              | 122              | 111              | 104              |        |                  |                                    |
| Model 1                    | 1.00                                           | 1.08 (0.90–1.30)                 | 1.24 (1.03–1.50) | 1.54 (1.26–1.88) | 1.55 (1.26–1.91) | <.0001 | 1.57 (1.34–1.84) |                                    |
| Model 2                    | 1.00                                           | 1.10 (0.91–1.35)                 | 1.20 (0.98–1.48) | 1.49 (1.20–1.86) | 1.42 (1.13–1.79) | <.0001 | 1.48 (1.22–1.78) |                                    |
| Model 3                    | 1.00                                           | 1.08 (0.88–1.33)                 | 1.14 (0.90–1.43) | 1.36 (1.06–1.75) | 1.26 (0.97–1.63) | .016   | 1.30 (1.03–1.64) |                                    |
| <b>Cancer mortality</b>    |                                                |                                  |                  |                  |                  |        |                  |                                    |
| No. of deaths (N=1,141)    | 775                                            | 105                              | 90               | 88               | 83               |        |                  |                                    |
| Model 1                    | 1.00                                           | 1.12 (0.91–1.38)                 | 1.07 (0.86–1.34) | 1.23 (0.98–1.54) | 1.36 (1.08–1.72) | .003   | 1.33 (1.11–1.59) |                                    |
| Model 2 <sup>e</sup>       | 1.00                                           | 1.05 (0.84–1.30)                 | 0.97 (0.77–1.22) | 1.05 (0.83–1.34) | 1.12 (0.86–1.44) | .488   | 1.07 (0.87–1.32) |                                    |
| Model 3 <sup>e</sup>       | 1.00                                           | 0.97 (0.76–1.22)                 | 0.88 (0.69–1.13) | 0.94 (0.72–1.23) | 0.96 (0.72–1.29) | .685   | 0.90 (0.70–1.16) |                                    |
|                            | Processed meat intake (g/d) <sup>b</sup>       |                                  |                  |                  |                  |        | P-trend          | 90 <sup>th</sup> vs 0 <sup>d</sup> |
|                            | Zero intake                                    | Quartiles of intake <sup>c</sup> |                  |                  |                  |        |                  |                                    |
|                            | 0                                              | Q1                               | Q2               | Q3               | Q4               |        |                  |                                    |
| No. of participants        | 32,167                                         | 3,835                            | 3,803            | 3,815            | 3,769            |        |                  |                                    |
| <b>All-cause mortality</b> |                                                |                                  |                  |                  |                  |        |                  |                                    |
| No. of deaths (N=4,870)    | 3,439                                          | 392                              | 337              | 333              | 369              |        |                  |                                    |
| Model 1                    | 1.00                                           | 1.02 (0.91–1.14)                 | 1.22 (1.08–1.37) | 1.31 (1.16–1.48) | 1.58 (1.40–1.78) | <.0001 | 1.57 (1.42–1.73) |                                    |
| Model 2                    | 1.00                                           | 0.97 (0.87–1.10)                 | 1.08 (0.96–1.22) | 1.17 (1.03–1.34) | 1.33 (1.16–1.51) | <.0001 | 1.29 (1.16–1.44) |                                    |
| Model 3                    | 1.00                                           | 0.94 (0.83–1.06)                 | 1.02 (0.90–1.16) | 1.08 (0.94–1.24) | 1.19 (1.04–1.37) | .019   | 1.17 (1.03–1.32) |                                    |

| <b>CVD–mortality</b>                                               |                    |                                        |                  |                  |                  |                |                                         |
|--------------------------------------------------------------------|--------------------|----------------------------------------|------------------|------------------|------------------|----------------|-----------------------------------------|
| No. of deaths (N=1,617)                                            | 1,144              | 136                                    | 112              | 101              | 124              |                |                                         |
| Model 1                                                            | 1.00               | 1.03 (0.85–1.25)                       | 1.27 (1.03–1.57) | 1.37 (1.07–1.75) | 1.64 (1.34–2.00) | <.0001         | 1.63 (1.37–1.94)                        |
| Model 2                                                            | 1.00               | 1.02 (0.83–1.25)                       | 1.21 (0.96–1.52) | 1.35 (1.04–1.75) | 1.51 (1.21–1.89) | <.0001         | 1.50 (1.23–1.83)                        |
| Model 3                                                            | 1.00               | 1.00 (0.80–1.25)                       | 1.14 (0.89–1.47) | 1.25 (0.95–1.65) | 1.34 (1.05–1.72) | .010           | 1.32 (1.06–1.66)                        |
| <b>Cancer mortality</b>                                            |                    |                                        |                  |                  |                  |                |                                         |
| No. of deaths (N=1,141)                                            | 810                | 79                                     | 86               | 73               | 93               |                |                                         |
| Model 1                                                            | 1.00               | 0.85 (0.66–1.09)                       | 1.18 (0.93–1.49) | 1.05 (0.81–1.35) | 1.47 (1.16–1.86) | .004           | 1.42 (1.16–1.73)                        |
| Model 2 <sup>e</sup>                                               | 1.00               | 0.80 (0.61–1.04)                       | 1.04 (0.82–1.33) | 0.91 (0.70–1.18) | 1.22 (0.94–1.57) | .388           | 1.15 (0.91–1.44)                        |
| Model 3 <sup>e</sup>                                               | 1.00               | 0.73 (0.56–0.96)                       | 0.97 (0.76–1.25) | 0.84 (0.64–1.12) | 1.11 (0.84–1.46) | .940           | 1.07 (0.83–1.38)                        |
| <b>Combined intake of red and processed meat (g/d)<sup>b</sup></b> |                    |                                        |                  |                  |                  |                |                                         |
|                                                                    | <b>Zero intake</b> | <b>Quartiles of intake<sup>c</sup></b> |                  |                  |                  | <b>P-trend</b> | <b>90<sup>th</sup> vs 0<sup>d</sup></b> |
|                                                                    | <b>0</b>           | <b>Q1</b>                              | <b>Q2</b>        | <b>Q3</b>        | <b>Q4</b>        |                |                                         |
| No. of participants                                                | 26,843             | 5,136                                  | 5,137            | 5,137            | 5,136            |                |                                         |
| <b>All–cause mortality</b>                                         |                    |                                        |                  |                  |                  |                |                                         |
| No. of deaths (N=4,870)                                            | 2,940              | 498                                    | 525              | 466              | 441              |                |                                         |
| Model 1                                                            | 1.00               | 1.04 (0.93–1.15)                       | 1.15 (1.04–1.27) | 1.36 (1.22–1.50) | 1.59 (1.44–1.76) | <.0001         | 1.55 (1.42–1.69)                        |
| Model 2                                                            | 1.00               | 1.02 (0.91–1.14)                       | 1.09 (0.98–1.22) | 1.21 (1.09–1.36) | 1.35 (1.20–1.52) | <.0001         | 1.30 (1.16–1.17)                        |
| Model 3 <sup>f</sup>                                               | 1.00               | 1.00 (0.89–1.12)                       | 1.06 (0.93–1.20) | 1.17 (1.03–1.34) | 1.29 (1.13–1.48) | <.001          | 1.24 (1.10–1.41)                        |
| <b>CVD–mortality</b>                                               |                    |                                        |                  |                  |                  |                |                                         |
| No. of deaths (N=1,617)                                            | 996                | 171                                    | 167              | 146              | 137              |                |                                         |
| Model 1                                                            | 1.00               | 1.03 (0.87–1.22)                       | 1.13 (0.96–1.35) | 1.43 (1.19–1.72) | 1.63 (1.35–1.96) | <.0001         | 1.58 (1.36–1.84)                        |
| Model 2                                                            | 1.00               | 1.06 (0.88–1.27)                       | 1.15 (0.95–1.39) | 1.39 (1.13–1.71) | 1.53 (1.23–1.90) | <.0001         | 1.52 (1.26–1.84)                        |
| Model 3 <sup>f</sup>                                               | 1.00               | 1.08 (0.88–1.33)                       | 1.18 (0.94–1.47) | 1.39 (1.08–1.79) | 1.51 (1.16–1.97) | .001           | 1.51 (1.19–1.93)                        |
| <b>Cancer mortality</b>                                            |                    |                                        |                  |                  |                  |                |                                         |
| No. of deaths (N=1,141)                                            | 679                | 113                                    | 124              | 118              | 107              |                |                                         |
| Model 1                                                            | 1.00               | 0.98 (0.80–1.21)                       | 1.07 (0.88–1.30) | 1.21 (0.97–1.51) | 1.37 (1.11–1.68) | .002           | 1.33 (1.12–1.58)                        |
| Model 2 <sup>e</sup>                                               | 1.00               | 0.94 (0.76–1.16)                       | 0.98 (0.79–1.21) | 1.04 (0.82–1.32) | 1.10 (0.87–1.40) | .477           | 1.07 (0.87–1.32)                        |
| Model 3 <sup>e,f</sup>                                             | 1.00               | 0.83 (0.66–1.05)                       | 0.85 (0.66–1.08) | 0.90 (0.68–1.19) | 0.94 (0.71–1.23) | .583           | 0.89 (0.69–1.15)                        |

<sup>a</sup> Data are given as hazard ratio (95% confidence interval).

<sup>b</sup> Values based on energy-adjusted variable.

<sup>c</sup> Quartiles based on percentiles of the energy-adjusted g/d intake among women. Median quartiles (g/d) are as follow: for unprocessed red meat, Q1=4, Q2=9.1, Q3=15.6, Q4=40.6; for processed meat, Q1=0.6, Q2=1.3, Q3=2.9, Q4=8.2; and for combined intake of red and processed meats, Q1=1.1, Q2=6.8, Q3=14.2, Q4=39.1.

**Model 1** adjusted for age (attained age as time variable), race (black and nonblack), and total energy intake (continuous).

**Model 2** adjusted for age (attained age as time variable), race (black, nonblack), total energy intake (continuous), marital status (married/common-law and single/widowed/divorced/separated), educational level (up to high school graduate, trade school/some college/associate degree, bachelor degree, and graduate degree), multivitamin use (current use), smoking status (current smoker, quit <1 year, quit 1–4 years, quit 5–9 years, quit 10–19 years, quit 20–29 years, quit ≥30 years, and never smoked), alcohol use (none, rarely, monthly, weekly, and daily), exercise (none, ≤20 min/wk, 21–60 min/wk, 61–150 min/wk, and ≥151 min/wk), and sleep (≤4 h/night, 5–8 h/night, and ≥9 h/night), body mass index (<18.5, 18.5–24.9, 25.0–29.9, or ≥30.0), aspirin use (used weekly for at least two years in the last five years), having been ever diagnosed with or received treatment in the last 12 months for diabetes, having been diagnosed in the last 5 years with or received treatment in the last 12 months for hypertension or hypercholesterolemia, the use of statin or blood pressure medications for at least 2 years in the last 5 years, menopausal status (premenopausal, postmenopausal), hormone therapy (in postmenopausal women) (not taking hormone therapy, taking hormone therapy), and dietary variables (each variable has 5 levels in g/d) as following: cruciferous vegetables (Quintiles: <9.6, 9.6–16.7, >16.7–26.1, >26.1–45.2, >45.2), fruits (Quintiles: <130, 130–224.4, >224.4–322, >322–464.2, >464.2), whole grain (Quintiles: <65, 65–109.9, >109.9–170.3, >170.3–252.2, >252.2), legumes (Quintiles: <17, 17–29.7, >29.7–45.9, >45.9–77.1, >77.1), nuts and seeds (Quintiles: <6.4, 6.4–12.8, >12.8–21.6, >21.6–35.1, >35.1), total dairy (0 intake, quartiles of intake: >0–36, >36–108.1, >108.1–240.9, >240.9), eggs (0 intake, quartiles of intake: >0–3.6, >3.6–7.3, >7.3–20.1, >20.1).

**Model 3:** In addition to covariates in model 2, also adjusted for other meat variables such as fish (0 intake, quartiles of intake: >0–7, >7–12.6, >12.6–21.4, >21.4) and unprocessed poultry (0 intake, quartiles of intake: >0–4.8, >4.8–10.4, >10.4–32.5, >32.5). Also, for model 3 in unprocessed red meat, processed meat was adjusted for (0 intake and quartiles of intake) and vice versa.

<sup>d</sup>Models in these analyses are correspondents to models 1, 2, and 3, except energy-adjusted log-transformed continuous dietary variables were used instead of five-level adjustment (90<sup>th</sup> percentile for unprocessed red meat: 43.2 g/d; for processed meat: 9.7 g/d; and for combined intake of red and processed meats: 48.4 g/d).

<sup>e</sup>Also adjusted for previous screening for colon or breast cancers during the last four years.

<sup>f</sup>Model 3 here did not adjust for either unprocessed red meat or processed meat, but rather both were combined and used as one exposure variable.

**Table S2. The association between red and processed meat intake and all-cause, cardiovascular and cancer mortality among men (N=24,760) <sup>a</sup>**

|                            | Unprocessed red meat intake (g/d) <sup>b</sup> |                                  |                  |                  |                  |         | P-trend          | 90 <sup>th</sup> vs 0 <sup>d</sup> |                                    |
|----------------------------|------------------------------------------------|----------------------------------|------------------|------------------|------------------|---------|------------------|------------------------------------|------------------------------------|
|                            | Zero intake                                    | Quartiles of intake <sup>c</sup> |                  |                  |                  | P-trend |                  |                                    | 90 <sup>th</sup> vs 0 <sup>d</sup> |
|                            | 0                                              | Q1                               | Q2               | Q3               | Q4               |         |                  |                                    |                                    |
| No. of participants        | 15,489                                         | 2,344                            | 2,316            | 2,303            | 2,308            |         |                  |                                    |                                    |
| <b>All-cause mortality</b> |                                                |                                  |                  |                  |                  |         |                  |                                    |                                    |
| No. of deaths (N=3,091)    | 2,014                                          | 320                              | 278              | 243              | 236              |         |                  |                                    |                                    |
| Model 1                    | 1.00                                           | 1.25 (1.11–1.41)                 | 1.34 (1.17–1.52) | 1.30 (1.14–1.49) | 1.65 (1.44–1.89) | <.0001  | 1.60 (1.44–1.78) |                                    |                                    |
| Model 2                    | 1.00                                           | 1.12 (0.98–1.27)                 | 1.15 (1.00–1.32) | 1.07 (0.92–1.24) | 1.22 (1.04–1.43) | .017    | 1.19 (1.05–1.36) |                                    |                                    |
| Model 3                    | 1.00                                           | 1.11 (0.96–1.28)                 | 1.14 (0.97–1.33) | 1.06 (0.89–1.26) | 1.21 (1.00–1.45) | .066    | 1.21 (1.03–1.43) |                                    |                                    |
| <b>CVD-mortality</b>       |                                                |                                  |                  |                  |                  |         |                  |                                    |                                    |
| No. of deaths (N=981)      | 642                                            | 116                              | 84               | 69               | 70               |         |                  |                                    |                                    |
| Model 1                    | 1.00                                           | 1.47 (1.20–1.79)                 | 1.38 (1.08–1.76) | 1.20 (0.93–1.55) | 1.59 (1.24–2.05) | <.0001  | 1.58 (1.30–1.91) |                                    |                                    |
| Model 2                    | 1.00                                           | 1.31 (1.06–1.63)                 | 1.20 (0.92–1.55) | 0.98 (0.75–1.30) | 1.19 (0.89–1.59) | .319    | 1.19 (0.94–1.49) |                                    |                                    |
| Model 3                    | 1.00                                           | 1.19 (0.94–1.50)                 | 1.05 (0.78–1.41) | 0.89 (0.65–1.23) | 1.13 (0.81–1.58) | .903    | 1.15 (0.86–1.55) |                                    |                                    |
| <b>Cancer mortality</b>    |                                                |                                  |                  |                  |                  |         |                  |                                    |                                    |
| No. of deaths (N=732)      | 453                                            | 75                               | 71               | 71               | 62               |         |                  |                                    |                                    |
| Model 1                    | 1.00                                           | 1.23 (0.96–1.58)                 | 1.30 (0.99–1.71) | 1.59 (1.23–2.05) | 1.77 (1.35–2.33) | <.0001  | 1.79 (1.45–2.21) |                                    |                                    |
| Model 2 <sup>e</sup>       | 1.00                                           | 1.08 (0.83–1.41)                 | 1.10 (0.83–1.46) | 1.25 (0.94–1.67) | 1.23 (0.90–1.68) | .088    | 1.29 (0.99–1.68) |                                    |                                    |
| Model 3 <sup>e</sup>       | 1.00                                           | 1.16 (0.87–1.54)                 | 1.17 (0.86–1.60) | 1.31 (0.94–1.83) | 1.23 (0.85–1.77) | .117    | 1.29 (0.93–1.79) |                                    |                                    |
|                            | Processed meat intake (g/d) <sup>b</sup>       |                                  |                  |                  |                  |         | P-trend          | 90 <sup>th</sup> vs 0 <sup>d</sup> |                                    |
|                            | Zero intake                                    | Quartiles of intake <sup>c</sup> |                  |                  |                  | P-trend |                  |                                    | 90 <sup>th</sup> vs 0 <sup>d</sup> |
|                            | 0                                              | Q1                               | Q2               | Q3               | Q4               |         |                  |                                    |                                    |
| No. of participants        | 15,960                                         | 2,196                            | 2,227            | 2,196            | 2,181            |         |                  |                                    |                                    |
| <b>All-cause mortality</b> |                                                |                                  |                  |                  |                  |         |                  |                                    |                                    |
| No. of deaths (N=3,091)    | 2,105                                          | 267                              | 263              | 232              | 224              |         |                  |                                    |                                    |
| Model 1                    | 1.00                                           | 1.10 (0.96–1.25)                 | 1.25 (1.09–1.43) | 1.32 (1.14–1.53) | 1.51 (1.31–1.74) | <.0001  | 1.50 (1.33–1.70) |                                    |                                    |
| Model 2                    | 1.00                                           | 1.00 (0.87–1.15)                 | 1.07 (0.93–1.23) | 1.05 (0.90–1.23) | 1.11 (0.94–1.31) | .184    | 1.08 (0.94–1.24) |                                    |                                    |
| Model 3                    | 1.00                                           | 0.97 (0.83–1.12)                 | 1.01 (0.86–1.18) | 1.00 (0.83–1.19) | 1.04 (0.87–1.26) | .732    | 0.99 (0.84–1.16) |                                    |                                    |

| <b>CVD–mortality</b>                                               |                    |                                        |                  |                  |                  |                |                                         |
|--------------------------------------------------------------------|--------------------|----------------------------------------|------------------|------------------|------------------|----------------|-----------------------------------------|
| No. of deaths (N=981)                                              | 677                | 87                                     | 91               | 74               | 52               |                |                                         |
| Model 1                                                            | 1.00               | 1.21 (0.95–1.56)                       | 1.46 (1.15–1.85) | 1.44 (1.11–1.85) | 1.24 (0.92–1.66) | <.001          | 1.39 (1.12–1.73)                        |
| Model 2                                                            | 1.00               | 1.10 (0.84–1.44)                       | 1.21 (0.94–1.57) | 1.12 (0.85–1.49) | 0.95 (0.68–1.32) | .576           | 1.01 (0.78–1.32)                        |
| Model 3                                                            | 1.00               | 0.97 (0.73–1.29)                       | 1.08 (0.81–1.45) | 1.02 (0.75–1.38) | 0.88 (0.60–1.29) | .821           | 0.87 (0.64–1.20)                        |
| <b>Cancer mortality</b>                                            |                    |                                        |                  |                  |                  |                |                                         |
| No. of deaths (N=732)                                              | 484                | 59                                     | 69               | 56               | 64               |                |                                         |
| Model 1                                                            | 1.00               | 0.96 (0.70–1.30)                       | 1.26 (0.95–1.66) | 1.25 (0.92–1.69) | 1.70 (1.29–2.22) | <.001          | 1.61 (1.28–2.03)                        |
| Model 2 <sup>e</sup>                                               | 1.00               | 0.84 (0.61–1.15)                       | 1.05 (0.78–1.41) | 0.94 (0.69–1.30) | 1.14 (0.84–1.55) | .624           | 1.08 (0.83–1.42)                        |
| Model 3 <sup>e</sup>                                               | 1.00               | 0.83 (0.59–1.16)                       | 0.99 (0.71–1.37) | 0.86 (0.61–1.22) | 1.00 (0.71–1.42) | .796           | 0.94 (0.68–1.28)                        |
| <b>Combined intake of red and processed meat (g/d)<sup>b</sup></b> |                    |                                        |                  |                  |                  |                |                                         |
|                                                                    | <b>Zero intake</b> | <b>Quartiles of intake<sup>c</sup></b> |                  |                  |                  | <b>P-trend</b> | <b>90<sup>th</sup> vs 0<sup>d</sup></b> |
|                                                                    | <b>0</b>           | <b>Q1</b>                              | <b>Q2</b>        | <b>Q3</b>        | <b>Q4</b>        |                |                                         |
| No. of participants                                                | 13,444             | 2,829                                  | 2,829            | 2,829            | 2,829            |                |                                         |
| <b>All–cause mortality</b>                                         |                    |                                        |                  |                  |                  |                |                                         |
| No. of deaths (N=3,091)                                            | 1,766              | 371                                    | 354              | 297              | 303              |                |                                         |
| Model 1                                                            | 1.00               | 1.13 (1.01–1.27)                       | 1.25 (1.11–1.41) | 1.33 (1.16–1.51) | 1.66 (1.47–1.88) | <.0001         | 1.56 (1.40–1.73)                        |
| Model 2                                                            | 1.00               | 1.07 (0.94–1.21)                       | 1.10 (0.96–1.25) | 1.10 (0.95–1.27) | 1.23 (1.06–1.43) | .010           | 1.19 (1.04–1.36)                        |
| Model 3 <sup>f</sup>                                               | 1.00               | 1.07 (0.92–1.25)                       | 1.10 (0.94–1.27) | 1.12 (0.93–1.34) | 1.26 (1.05–1.51) | .021           | 1.21 (1.03–1.42)                        |
| <b>CVD–mortality</b>                                               |                    |                                        |                  |                  |                  |                |                                         |
| No. of deaths (N=981)                                              | 568                | 126                                    | 116              | 81               | 90               |                |                                         |
| Model 1                                                            | 1.00               | 1.30 (1.03–1.65)                       | 1.39 (1.13–1.71) | 1.23 (0.97–1.56) | 1.60 (1.27–2.01) | <.0001         | 1.57 (1.30–1.89)                        |
| Model 2                                                            | 1.00               | 1.21 (0.94–1.56)                       | 1.23 (0.98–1.54) | 1.02 (0.78–1.33) | 1.21 (0.92–1.60) | .218           | 1.17 (0.93–1.48)                        |
| Model 3 <sup>f</sup>                                               | 1.00               | 1.08 (0.80–1.47)                       | 1.06 (0.80–1.40) | 0.88 (0.63–1.21) | 1.10 (0.79–1.53) | .998           | 1.07 (0.81–1.42)                        |
| <b>Cancer mortality</b>                                            |                    |                                        |                  |                  |                  |                |                                         |
| No. of deaths (N=732)                                              | 401                | 82                                     | 81               | 84               | 84               |                |                                         |
| Model 1                                                            | 1.00               | 1.02 (0.78–1.34)                       | 1.19 (0.91–1.55) | 1.41 (1.08–1.83) | 1.90 (1.49–2.41) | <.0001         | 1.74 (1.41–2.15)                        |
| Model 2 <sup>e</sup>                                               | 1.00               | 0.93 (0.70–1.23)                       | 1.00 (0.75–1.33) | 1.13 (0.85–1.49) | 1.28 (0.95–1.71) | .116           | 1.23 (0.95–1.61)                        |
| Model 3 <sup>e,f</sup>                                             | 1.00               | 0.96 (0.71–1.31)                       | 1.03 (0.75–1.42) | 1.18 (0.84–1.65) | 1.28 (0.91–1.79) | .111           | 1.18 (0.86–1.62)                        |

<sup>a</sup> Data are given as hazard ratio (95% confidence interval).

<sup>b</sup> Values based on energy-adjusted variable.

<sup>c</sup> Quartiles based on percentiles of the energy-adjusted g/d intake among men. Median quartiles (g/d) are as follow: for unprocessed red meat, Q1=4, Q2=9.1, Q3=15.5, Q4=43.6; for processed meat, Q1=0.7, Q2=1.6, Q3=4, Q4=11.3; and for combined intake of red and processed meats, Q1=1.7, Q2=8.6, Q3=17.9, Q4=50.2.

**Model 1** adjusted for age (attained age as time variable), race (black, nonblack), and total energy intake (continuous).

**Model 2** adjusted for age (attained age as time variable), race (black, nonblack), total energy intake (continuous), marital status (married/common-law and single/widowed/divorced/separated), educational level (up to high school graduate, trade school/some college/associate degree, bachelor degree, and graduate degree), multivitamin use (current use), smoking status (current smoker, quit <1 year, quit 1–4 years, quit 5–9 years, quit 10–19 years, quit 20–29 years, quit ≥30 years, and never smoked), alcohol use (none, rarely, monthly, weekly, and daily), exercise (none, ≤20 min/wk, 21–60 min/wk, 61–150 min/wk, and ≥151 min/wk), and sleep (≤4 h/night, 5–8 h/night, and ≥9 h/night), body mass index (<18.5, 18.5–24.9, 25.0–29.9, or ≥30.0), aspirin use (used weekly for at least two years in the last five years), having been ever diagnosed with or received treatment in the last 12 months for diabetes, having been diagnosed in the last 5 years with or received treatment in the last 12 months for hypertension or hypercholesterolemia, the use of statin or blood pressure medications for at least 2 years in the last 5 years, and dietary variables (each variable has 5 levels in g/d) as following: cruciferous vegetables (Quintiles: <9.6, 9.6–16.7, >16.7–26.1, >26.1–45.2, >45.2), fruits (Quintiles: <130, 130–224.4, >224.4–322, >322–464.2, >464.2), whole grain (Quintiles: <65, 65–109.9, >109.9–170.3, >170.3–252.2, >252.2), legumes (Quintiles: <17, 17–29.7, >29.7–45.9, >45.9–77.1, >77.1), nuts and seeds (Quintiles: <6.4, 6.4–12.8, >12.8–21.6, >21.6–35.1, >35.1), total dairy (0 intake, quartiles of intake: >0–36, >36–108.1, >108.1–240.9, >240.9), eggs (0 intake, quartiles of intake: >0–3.6, >3.6–7.3, >7.3–20.1, >20.1).

**Model 3:** In addition to covariates in model 2, also adjusted for other meat variables such as fish (0 intake, quartiles of intake: >0–7, >7–12.6, >12.6–21.4, >21.4) and unprocessed poultry (0 intake, quartiles of intake: >0–4.8, >4.8–10.4, >10.4–32.5, >32.5). Also, for model 3 in unprocessed red meat, processed meat was adjusted for (0 intake and quartiles of intake) and vice versa.

<sup>d</sup> Models in these analyses are correspondents to models 1, 2, and 3, except energy-adjusted log-transformed continuous dietary variables were used instead of five-level adjustment (90<sup>th</sup> percentile for unprocessed red meat: 52.9 g/d; for processed meat: 13 g/d; and for combined intake of red and processed meats: 56.7 g/d).

<sup>e</sup> Also adjusted for previous screening for colon or prostate cancers during the last four years.

<sup>f</sup> Model 3 here did not adjust for either unprocessed red meat or processed meat, but rather both were combined and used as one exposure variable.

**Table S3. The association between red and processed meat intake and all-cause, cardiovascular and cancer mortality among Blacks (N=19,663) <sup>a</sup>**

|                                                 | Unprocessed red meat intake (g/d) <sup>b</sup> |                                  |                  |                  |                  |         |                                    |
|-------------------------------------------------|------------------------------------------------|----------------------------------|------------------|------------------|------------------|---------|------------------------------------|
|                                                 | Zero intake                                    | Quartiles of intake <sup>c</sup> |                  |                  |                  | P-trend | 90 <sup>th</sup> vs 0 <sup>d</sup> |
|                                                 | 0                                              | Q1                               | Q2               | Q3               | Q4               |         |                                    |
| No. of participants                             | 11,985                                         | 1,931                            | 1,910            | 1,930            | 1,907            |         |                                    |
| <b>All-cause mortality</b>                      |                                                |                                  |                  |                  |                  |         |                                    |
| No. of deaths (N=1,506)                         | 890                                            | 157                              | 164              | 152              | 143              |         |                                    |
| Model 1                                         | 1.00                                           | 1.30 (1.09–1.55)                 | 1.40 (1.18–1.66) | 1.50 (1.25–1.80) | 1.58 (1.25–1.89) | <.0001  | 1.67 (1.44–1.92)                   |
| Model 2                                         | 1.00                                           | 1.17 (0.96–1.42)                 | 1.26 (1.05–1.51) | 1.25 (1.02–1.52) | 1.28 (1.05–1.57) | .002    | 1.30 (1.09–1.56)                   |
| Model 3                                         | 1.00                                           | 1.08 (0.89–1.33)                 | 1.15 (0.95–1.40) | 1.14 (0.92–1.42) | 1.14 (0.90–1.43) | .120    | 1.18 (0.96–1.45)                   |
| <b>CVD-mortality</b>                            |                                                |                                  |                  |                  |                  |         |                                    |
| No. of deaths (N=487)                           | 277                                            | 60                               | 48               | 47               | 55               |         |                                    |
| Model 1                                         | 1.00                                           | 1.68 (1.24–2.27)                 | 1.34 (0.98–1.83) | 1.65 (1.20–2.28) | 1.98 (1.46–2.67) | <.0001  | 1.97 (1.54–2.51)                   |
| Model 2                                         | 1.00                                           | 1.56 (1.12–2.17)                 | 1.27 (0.90–1.79) | 1.49 (1.04–2.16) | 1.77 (1.24–2.51) | .001    | 1.72 (1.27–2.32)                   |
| Model 3                                         | 1.00                                           | 1.42 (0.99–2.02)                 | 1.15 (0.80–1.66) | 1.38 (0.94–2.02) | 1.70 (1.14–2.52) | .018    | 1.69 (1.18–2.40)                   |
| <b>Cancer mortality</b>                         |                                                |                                  |                  |                  |                  |         |                                    |
| No. of deaths (N=410)                           | 273                                            | 34                               | 38               | 35               | 30               |         |                                    |
| Model 1                                         | 1.00                                           | 0.91 (0.63–1.30)                 | 0.98 (0.69–1.39) | 1.01 (0.71–1.46) | 1.06 (0.72–1.55) | .863    | 1.03 (0.76–1.38)                   |
| Model 2 <sup>e</sup>                            | 1.00                                           | 0.81 (0.56–1.18)                 | 0.93 (0.64–1.34) | 0.90 (0.61–1.33) | 0.93 (0.62–1.42) | .583    | 0.89 (0.63–1.26)                   |
| Model 3 <sup>e</sup>                            | 1.00                                           | 0.77 (0.52–1.13)                 | 0.86 (0.58–1.28) | 0.86 (0.57–1.31) | 0.80 (0.50–1.28) | .407    | 0.78 (0.52–1.18)                   |
| <b>Processed meat intake (g/d) <sup>b</sup></b> |                                                |                                  |                  |                  |                  |         |                                    |
|                                                 | Zero intake                                    | Quartiles of intake <sup>c</sup> |                  |                  |                  | P-trend | 90 <sup>th</sup> vs 0 <sup>d</sup> |
|                                                 | 0                                              | Q1                               | Q2               | Q3               | Q4               |         |                                    |
| No. of participants                             | 10,620                                         | 2,254                            | 2,293            | 2,241            | 2,255            |         |                                    |
| <b>All-cause mortality</b>                      |                                                |                                  |                  |                  |                  |         |                                    |
| No. of deaths (N=1,506)                         | 779                                            | 181                              | 163              | 185              | 198              |         |                                    |
| Model 1                                         | 1.00                                           | 1.13 (0.96–1.33)                 | 1.36 (1.15–1.63) | 1.40 (1.18–1.66) | 1.74 (1.48–2.05) | <.0001  | 1.70 (1.48–1.96)                   |
| Model 2                                         | 1.00                                           | 1.04 (0.88–1.24)                 | 1.21 (0.99–1.47) | 1.20 (1.00–1.43) | 1.42 (1.18–1.71) | <.001   | 1.31 (1.12–1.55)                   |
| Model 3                                         | 1.00                                           | 0.98 (0.82–1.18)                 | 1.13 (0.92–1.39) | 1.13 (0.92–1.37) | 1.33 (1.08–1.65) | .008    | 1.21 (1.00–1.47)                   |



|                                                                     |                    |                                         |                  |                  |                  |                |                                          |
|---------------------------------------------------------------------|--------------------|-----------------------------------------|------------------|------------------|------------------|----------------|------------------------------------------|
| <b>CVD–mortality</b>                                                |                    |                                         |                  |                  |                  |                |                                          |
| No. of deaths (N=487)                                               | 243                | 66                                      | 57               | 69               | 52               |                |                                          |
| Model 1                                                             | 1.00               | 1.29 (0.96–1.73)                        | 1.63 (1.21–2.19) | 1.89 (1.41–2.52) | 1.55 (1.14–2.12) | <.0001         | 1.72 (1.34–2.22)                         |
| Model 2                                                             | 1.00               | 1.24 (0.92–1.69)                        | 1.53 (1.09–2.15) | 1.67 (1.19–2.35) | 1.27 (0.87–1.85) | .015           | 1.33 (0.97–1.82)                         |
| Model 3                                                             | 1.00               | 1.16 (0.82–1.63)                        | 1.37 (0.94–1.99) | 1.48 (1.01–2.18) | 1.07 (0.70–1.62) | .208           | 1.07 (0.74–1.55)                         |
| <b>Cancer mortality</b>                                             |                    |                                         |                  |                  |                  |                |                                          |
| No. of deaths (N=410)                                               | 235                | 40                                      | 49               | 41               | 45               |                |                                          |
| Model 1                                                             | 1.00               | 0.86 (0.61–1.21)                        | 1.15 (0.81–1.61) | 0.96 (0.66–1.40) | 1.19 (0.84–1.69) | .442           | 1.14 (0.83–1.55)                         |
| Model 2 <sup>e</sup>                                                | 1.00               | 0.80 (0.56–1.14)                        | 1.07 (0.74–1.53) | 0.89 (0.59–1.33) | 1.09 (0.74–1.61) | .876           | 1.00 (0.70–1.43)                         |
| Model 3 <sup>e</sup>                                                | 1.00               | 0.76 (0.52–1.11)                        | 1.08 (0.74–1.59) | 0.91 (0.59–1.41) | 1.09 (0.70–1.71) | .868           | 0.98 (0.65–1.48)                         |
| <b>Combined intake of red and processed meat (g/d) <sup>b</sup></b> |                    |                                         |                  |                  |                  |                |                                          |
|                                                                     | <b>Zero intake</b> | <b>Quartiles of intake <sup>c</sup></b> |                  |                  |                  | <b>P-trend</b> | <b>90<sup>th</sup> vs 0 <sup>d</sup></b> |
|                                                                     | <b>0</b>           | <b>Q1</b>                               | <b>Q2</b>        | <b>Q3</b>        | <b>Q4</b>        |                |                                          |
| No. of participants                                                 | 9,053              | 2,652                                   | 2,653            | 2,653            | 2,652            |                |                                          |
| <b>All–cause mortality</b>                                          |                    |                                         |                  |                  |                  |                |                                          |
| No. of deaths (N=1,506)                                             | 665                | 195                                     | 217              | 219              | 210              |                |                                          |
| Model 1                                                             | 1.00               | 1.18 (1.00–1.38)                        | 1.25 (1.07–1.47) | 1.50 (1.28–1.76) | 1.71 (1.46–2.01) | <.0001         | 1.69 (1.47–1.94)                         |
| Model 2                                                             | 1.00               | 1.11 (0.93–1.32)                        | 1.15 (0.96–1.38) | 1.30 (1.08–1.56) | 1.38 (1.14–1.67) | <.001          | 1.33 (1.12–1.59)                         |
| Model 3 <sup>f</sup>                                                | 1.00               | 1.08 (0.90–1.31)                        | 1.12 (0.92–1.36) | 1.27 (1.03–1.56) | 1.36 (1.09–1.69) | .003           | 1.32 (1.08–1.60)                         |
| <b>CVD–mortality</b>                                                |                    |                                         |                  |                  |                  |                |                                          |
| No. of deaths (N=487)                                               | 202                | 67                                      | 83               | 61               | 74               |                |                                          |
| Model 1                                                             | 1.00               | 1.37 (1.04–1.82)                        | 1.63 (1.25–2.13) | 1.49 (1.11–1.99) | 2.04 (1.53–2.72) | <.0001         | 1.97 (1.55–2.51)                         |
| Model 2                                                             | 1.00               | 1.41 (1.04–1.90)                        | 1.62 (1.20–2.20) | 1.40 (0.99–1.99) | 1.82 (1.26–2.64) | .001           | 1.73 (1.27–2.34)                         |
| Model 3 <sup>f</sup>                                                | 1.00               | 1.44 (1.03–2.01)                        | 1.67 (1.19–2.35) | 1.44 (0.98–2.12) | 1.94 (1.26–2.97) | .005           | 1.79 (1.26–2.55)                         |
| <b>Cancer mortality</b>                                             |                    |                                         |                  |                  |                  |                |                                          |
| No. of deaths (N=410)                                               | 207                | 59                                      | 41               | 59               | 44               |                |                                          |
| Model 1                                                             | 1.00               | 1.07 (0.80–1.43)                        | 0.75 (0.53–1.05) | 1.17 (0.86–1.60) | 1.08 (0.77–1.53) | .659           | 1.05 (0.79–1.39)                         |
| Model 2 <sup>e</sup>                                                | 1.00               | 0.99 (0.73–1.36)                        | 0.70 (0.48–1.01) | 1.08 (0.76–1.54) | 0.93 (0.63–1.37) | .704           | 0.89 (0.63–1.26)                         |
| Model 3 <sup>e,f</sup>                                              | 1.00               | 0.92 (0.64–1.32)                        | 0.62 (0.42–0.93) | 0.98 (0.65–1.47) | 0.81 (0.53–1.23) | .363           | 0.74 (0.51–1.09)                         |

<sup>a</sup> Data are given as hazard ratio (95% confidence interval).

<sup>b</sup> Values based on energy-adjusted variable.

<sup>c</sup> Quartiles based on percentiles of the energy-adjusted g/d intake among Blacks. Median quartiles (g/d) are as follow: for unprocessed red meat, Q1=4.1, Q2=9.2, Q3=15.6, Q4=42.4; for processed meat, Q1=0.7, Q2=1.5, Q3=3.7, Q4=10; and for combined intake of red and processed meats, Q1=0.8, Q2=6.2, Q3=13.4, Q4=39.3.

**Model 1** adjusted for age (attained age as time variable), sex (male and female), and total energy intake (continuous).

**Model 2** adjusted for age (attained age as time variable), sex (male and female), total energy intake (continuous), marital status (married/common-law and single/widowed/divorced/separated), educational level (up to high school graduate, trade school/some college/associate degree, bachelor degree, and graduate degree), multivitamin use (current use), smoking status (current smoker, quit <1 year, quit 1–4 years, quit 5–9 years, quit 10–19 years, quit 20–29 years, quit ≥30 years, and never smoked), alcohol use (none, rarely, monthly, weekly, and daily), exercise (none, ≤20 min/wk, 21–60 min/wk, 61–150 min/wk, and ≥151 min/wk), and sleep (≤4 h/night, 5–8 h/night, and ≥9 h/night), body mass index (<18.5, 18.5–24.9, 25.0–29.9, or ≥30.0), aspirin use (used weekly for at least two years in the last five years), having been ever diagnosed with or received treatment in the last 12 months for diabetes, having been diagnosed in the last 5 years with or received treatment in the last 12 months for hypertension or hypercholesterolemia, the use of statin or blood pressure medications for at least 2 years in the last 5 years, and dietary variables (each variable has 5 levels in g/d) as following: cruciferous vegetables (Quintiles: <9.6, 9.6–16.7, >16.7–26.1, >26.1–45.2, >45.2), fruits (Quintiles: <130, 130–224.4, >224.4–322, >322–464.2, >464.2), whole grain (Quintiles: <65, 65–109.9, >109.9–170.3, >170.3–252.2, >252.2), legumes (Quintiles: <17, 17–29.7, >29.7–45.9, >45.9–77.1, >77.1), nuts and seeds (Quintiles: <6.4, 6.4–12.8, >12.8–21.6, >21.6–35.1, >35.1), total dairy (0 intake, quartiles of intake: >0–36, >36–108.1, >108.1–240.9, >240.9), eggs (0 intake, quartiles of intake: >0–3.6, >3.6–7.3, >7.3–20.1, >20.1); and in women, the model also adjusted for menopausal status (premenopausal, postmenopausal), and hormone therapy (in postmenopausal women) (not taking hormone therapy, taking hormone therapy).

**Model 3:** In addition to covariates in model 2, also adjusted for other meat variables such as fish (0 intake, quartiles of intake: >0–7, >7–12.6, >12.6–21.4, >21.4) and unprocessed poultry (0 intake, quartiles of intake: >0–4.8, >4.8–10.4, >10.4–32.5, >32.5). Also, for model 3 in unprocessed red meat, processed meat was adjusted for (0 intake and quartiles of intake) and vice versa.

<sup>d</sup>Models in these analyses are correspondents to models 1, 2, and 3, except energy-adjusted log-transformed continuous dietary variables were used instead of five-level adjustment (90<sup>th</sup> percentile for unprocessed red meat: 43.5 g/d; for processed meat: 11.7 g/d; and for combined intake of red and processed meats: 45.8 g/d).

<sup>e</sup> Also adjusted for previous screening for colon, prostate, or breast cancers during the last four years.

<sup>f</sup> Model 3 here did not adjust for either unprocessed red meat or processed meat, but rather both were combined and used as one exposure variable.

**Table S4. The association between red and processed meat intake and all-cause, cardiovascular and cancer mortality among non-Blacks (N=52,486) <sup>a</sup>**

|                                                 | Unprocessed red meat intake (g/d) <sup>b</sup> |                                  |                  |                  |                  |         |                                    |
|-------------------------------------------------|------------------------------------------------|----------------------------------|------------------|------------------|------------------|---------|------------------------------------|
|                                                 | Zero intake                                    | Quartiles of intake <sup>c</sup> |                  |                  |                  | P-trend | 90 <sup>th</sup> vs 0 <sup>d</sup> |
|                                                 | 0                                              | Q1                               | Q2               | Q3               | Q4               |         |                                    |
| No. of participants                             | 34,628                                         | 4,489                            | 4,476            | 4,433            | 4,460            |         |                                    |
| <b>All-cause mortality</b>                      |                                                |                                  |                  |                  |                  |         |                                    |
| No. of deaths (N=6,455)                         | 4,486                                          | 578                              | 514              | 431              | 446              |         |                                    |
| Model 1                                         | 1.00                                           | 1.13 (1.03–1.24)                 | 1.23 (1.11–1.35) | 1.37 (1.24–1.51) | 1.64 (1.48–1.81) | <.0001  | 1.55 (1.44–1.67)                   |
| Model 2                                         | 1.00                                           | 1.06 (0.97–1.17)                 | 1.12 (1.01–1.23) | 1.16 (1.04–1.30) | 1.27 (1.13–1.42) | <.0001  | 1.24 (1.13–1.36)                   |
| Model 3                                         | 1.00                                           | 1.05 (0.95–1.17)                 | 1.10 (0.98–1.23) | 1.13 (0.99–1.28) | 1.21 (1.06–1.38) | .002    | 1.20 (1.06–1.34)                   |
| <b>CVD-mortality</b>                            |                                                |                                  |                  |                  |                  |         |                                    |
| No. of deaths (N=2,111)                         | 1,508                                          | 193                              | 161              | 117              | 132              |         |                                    |
| Model 1                                         | 1.00                                           | 1.15 (0.99–1.35)                 | 1.25 (1.05–1.48) | 1.25 (1.03–1.52) | 1.62 (1.35–1.94) | <.0001  | 1.51 (1.31–1.74)                   |
| Model 2                                         | 1.00                                           | 1.11 (0.95–1.31)                 | 1.17 (0.98–1.40) | 1.11 (0.90–1.37) | 1.33 (1.08–1.62) | .005    | 1.29 (1.09–1.52)                   |
| Model 3                                         | 1.00                                           | 1.06 (0.89–1.27)                 | 1.09 (0.90–1.33) | 1.00 (0.78–1.28) | 1.17 (0.92–1.49) | .269    | 1.17 (0.95–1.43)                   |
| <b>Cancer mortality</b>                         |                                                |                                  |                  |                  |                  |         |                                    |
| No. of deaths (N=1,463)                         | 955                                            | 141                              | 125              | 123              | 119              |         |                                    |
| Model 1                                         | 1.00                                           | 1.21 (1.01–1.46)                 | 1.21 (0.99–1.48) | 1.54 (1.28–1.87) | 1.72 (1.42–2.09) | <.0001  | 1.68 (1.44–1.96)                   |
| Model 2 <sup>e</sup>                            | 1.00                                           | 1.10 (0.91–1.33)                 | 1.06 (0.86–1.30) | 1.24 (1.01–1.53) | 1.24 (0.99–1.54) | .023    | 1.24 (1.03–1.49)                   |
| Model 3 <sup>e</sup>                            | 1.00                                           | 1.10 (0.89–1.35)                 | 1.04 (0.82–1.31) | 1.20 (0.94–1.52) | 1.15 (0.89–1.49) | .159    | 1.12 (0.89–1.41)                   |
| <b>Processed meat intake (g/d) <sup>b</sup></b> |                                                |                                  |                  |                  |                  |         |                                    |
|                                                 | Zero intake                                    | Quartiles of intake <sup>c</sup> |                  |                  |                  | P-trend | 90 <sup>th</sup> vs 0 <sup>d</sup> |
|                                                 | 0                                              | Q1                               | Q2               | Q3               | Q4               |         |                                    |
| No. of participants                             | 37,507                                         | 3,779                            | 3,715            | 3,795            | 3,690            |         |                                    |
| <b>All-cause mortality</b>                      |                                                |                                  |                  |                  |                  |         |                                    |
| No. of deaths (N=6,455)                         | 4,765                                          | 470                              | 428              | 382              | 410              |         |                                    |
| Model 1                                         | 1.00                                           | 1.03 (0.93–1.14)                 | 1.18 (1.06–1.31) | 1.24 (1.12–1.39) | 1.55 (1.39–1.72) | <.0001  | 1.47 (1.35–1.60)                   |
| Model 2                                         | 1.00                                           | 0.97 (0.87–1.08)                 | 1.04 (0.93–1.16) | 1.06 (0.94–1.20) | 1.20 (1.07–1.35) | .005    | 1.14 (1.03–1.26)                   |
| Model 3                                         | 1.00                                           | 0.93 (0.83–1.05)                 | 0.98 (0.88–1.11) | 0.98 (0.86–1.12) | 1.09 (0.96–1.24) | .441    | 1.03 (0.92–1.15)                   |

|                                                                    |                    |                                        |                  |                  |                  |                |                                         |
|--------------------------------------------------------------------|--------------------|----------------------------------------|------------------|------------------|------------------|----------------|-----------------------------------------|
| <b>CVD–mortality</b>                                               |                    |                                        |                  |                  |                  |                |                                         |
| No. of deaths (N=2,111)                                            | 1,578              | 152                                    | 141              | 115              | 125              |                |                                         |
| Model 1                                                            | 1.00               | 1.06 (0.88–1.28)                       | 1.22 (1.02–1.47) | 1.25 (1.02–1.52) | 1.55 (1.29–1.88) | <.0001         | 1.46 (1.25–1.71)                        |
| Model 2                                                            | 1.00               | 1.01 (0.82–1.24)                       | 1.12 (0.91–1.37) | 1.13 (0.92–1.40) | 1.33 (1.08–1.63) | .007           | 1.24 (1.04–1.49)                        |
| Model 3                                                            | 1.00               | 0.96 (0.77–1.19)                       | 1.06 (0.84–1.33) | 1.05 (0.83–1.32) | 1.22 (0.97–1.53) | .174           | 1.10 (0.89–1.36)                        |
| <b>Cancer mortality</b>                                            |                    |                                        |                  |                  |                  |                |                                         |
| No. of deaths (N=1,463)                                            | 1,059              | 102                                    | 92               | 97               | 113              |                |                                         |
| Model 1                                                            | 1.00               | 0.94 (0.76–1.18)                       | 1.09 (0.86–1.38) | 1.24 (1.00–1.55) | 1.74 (1.43–2.13) | <.0001         | 1.63 (1.38–1.93)                        |
| Model 2 <sup>e</sup>                                               | 1.00               | 0.86 (0.68–1.08)                       | 0.91 (0.71–1.17) | 0.99 (0.79–1.24) | 1.22 (0.97–1.53) | .321           | 1.17 (0.96–1.42)                        |
| Model 3 <sup>e</sup>                                               | 1.00               | 0.80 (0.63–1.01)                       | 0.83 (0.65–1.08) | 0.87 (0.68–1.12) | 1.07 (0.83–1.37) | .773           | 1.05 (0.84–1.31)                        |
| <b>Combined intake of red and processed meat (g/d)<sup>b</sup></b> |                    |                                        |                  |                  |                  |                |                                         |
|                                                                    | <b>Zero intake</b> | <b>Quartiles of intake<sup>c</sup></b> |                  |                  |                  | <b>P-trend</b> | <b>90<sup>th</sup> vs 0<sup>d</sup></b> |
|                                                                    | <b>0</b>           | <b>Q1</b>                              | <b>Q2</b>        | <b>Q3</b>        | <b>Q4</b>        |                |                                         |
| No. of participants                                                | 31,234             | 5,313                                  | 5,313            | 5,313            | 5,313            |                |                                         |
| <b>All–cause mortality</b>                                         |                    |                                        |                  |                  |                  |                |                                         |
| No. of deaths (N=6,455)                                            | 4,041              | 687                                    | 659              | 523              | 545              |                |                                         |
| Model 1                                                            | 1.00               | 1.05 (0.96–1.14)                       | 1.18 (1.08–1.28) | 1.30 (1.18–1.43) | 1.64 (1.50–1.80) | <.0001         | 1.52 (1.41–1.64)                        |
| Model 2                                                            | 1.00               | 1.01 (0.92–1.11)                       | 1.09 (0.99–1.20) | 1.13 (1.01–1.25) | 1.28 (1.15–1.42) | <.0001         | 1.22 (1.12–1.34)                        |
| Model 3 <sup>f</sup>                                               | 1.00               | 1.00 (0.90–1.11)                       | 1.07 (0.95–1.19) | 1.11 (0.98–1.26) | 1.25 (1.10–1.42) | <.001          | 1.20 (1.07–1.35)                        |
| <b>CVD–mortality</b>                                               |                    |                                        |                  |                  |                  |                |                                         |
| No. of deaths (N=2,111)                                            | 1,362              | 227                                    | 216              | 149              | 157              |                |                                         |
| Model 1                                                            | 1.00               | 1.06 (0.90–1.25)                       | 1.21 (1.03–1.41) | 1.25 (1.05–1.48) | 1.58 (1.33–1.87) | <.0001         | 1.50 (1.31–1.71)                        |
| Model 2                                                            | 1.00               | 1.05 (0.87–1.26)                       | 1.15 (0.97–1.36) | 1.13 (0.93–1.36) | 1.32 (1.08–1.60) | .004           | 1.30 (1.11–1.53)                        |
| Model 3 <sup>f</sup>                                               | 1.00               | 1.01 (0.81–1.25)                       | 1.09 (0.90–1.32) | 1.05 (0.84–1.31) | 1.23 (0.97–1.55) | .115           | 1.22 (0.99–1.49)                        |
| <b>Cancer mortality</b>                                            |                    |                                        |                  |                  |                  |                |                                         |
| No. of deaths (N=1,463)                                            | 873                | 141                                    | 162              | 134              | 153              |                |                                         |
| Model 1                                                            | 1.00               | 0.97 (0.80–1.17)                       | 1.23 (1.02–1.47) | 1.29 (1.06–1.57) | 1.81 (1.52–2.16) | <.0001         | 1.64 (1.42–1.91)                        |
| Model 2 <sup>e</sup>                                               | 1.00               | 0.90 (0.74–1.10)                       | 1.07 (0.88–1.31) | 1.04 (0.84–1.28) | 1.28 (1.03–1.57) | .051           | 1.20 (1.00–1.44)                        |
| Model 3 <sup>e,f</sup>                                             | 1.00               | 0.84 (0.68–1.05)                       | 0.99 (0.79–1.25) | 0.96 (0.75–1.23) | 1.17 (0.92–1.49) | .261           | 1.09 (0.86–1.36)                        |

<sup>a</sup> Data are given as hazard ratio (95% confidence interval).

<sup>b</sup> Values based on energy-adjusted variable.

<sup>c</sup> Quartiles based on percentiles of the energy-adjusted g/d intake among non-Blacks. Median quartiles (g/d) are as follow: for unprocessed red meat, Q1=4, Q2=9, Q3=15.6, Q4=41.4; for processed meat, Q1=0.6, Q2=1.4, Q3=3.2, Q4=8.9; and for combined intake of red and processed meats, Q1=2, Q2=8.1, Q3=16.4, Q4=44.4.

**Model 1** adjusted for age (attained age as time variable), sex (male and female), and total energy intake (continuous).

**Model 2** adjusted for age (attained age as time variable), sex (male and female), total energy intake (continuous), marital status (married/common-law and single/widowed/divorced/separated), educational level (up to high school graduate, trade school/some college/associate degree, bachelor degree, and graduate degree), multivitamin use (current use), smoking status (current smoker, quit <1 year, quit 1–4 years, quit 5–9 years, quit 10–19 years, quit 20–29 years, quit ≥30 years, and never smoked), alcohol use (none, rarely, monthly, weekly, and daily), exercise (none, ≤20 min/wk, 21–60 min/wk, 61–150 min/wk, and ≥151 min/wk), and sleep (≤4 h/night, 5–8 h/night, and ≥9 h/night), body mass index (<18.5, 18.5–24.9, 25.0–29.9, or ≥30.0), aspirin use (used weekly for at least two years in the last five years), having been ever diagnosed with or received treatment in the last 12 months for diabetes, having been diagnosed in the last 5 years with or received treatment in the last 12 months for hypertension or hypercholesterolemia, the use of statin or blood pressure medications for at least 2 years in the last 5 years, and dietary variables (each variable has 5 levels in g/d) as following: cruciferous vegetables (Quintiles: <9.6, 9.6–16.7, >16.7–26.1, >26.1–45.2, >45.2), fruits (Quintiles: <130, 130–224.4, >224.4–322, >322–464.2, >464.2), whole grain (Quintiles: <65, 65–109.9, >109.9–170.3, >170.3–252.2, >252.2), legumes (Quintiles: <17, 17–29.7, >29.7–45.9, >45.9–77.1, >77.1), nuts and seeds (Quintiles: <6.4, 6.4–12.8, >12.8–21.6, >21.6–35.1, >35.1), total dairy (0 intake, quartiles of intake: >0–36, >36–108.1, >108.1–240.9, >240.9), eggs (0 intake, quartiles of intake: >0–3.6, >3.6–7.3, >7.3–20.1, >20.1); and in women, the model also adjusted for menopausal status (premenopausal, postmenopausal), and hormone therapy (in postmenopausal women) (not taking hormone therapy, taking hormone therapy).

**Model 3:** In addition to covariates in model 2, also adjusted for other meat variables such as fish (0 intake, quartiles of intake: >0–7, >7–12.6, >12.6–21.4, >21.4) and unprocessed poultry (0 intake, quartiles of intake: >0–4.8, >4.8–10.4, >10.4–32.5, >32.5). Also, for model 3 in unprocessed red meat, processed meat was adjusted for (0 intake and quartiles of intake) and vice versa.

<sup>d</sup>Models in these analyses are correspondents to models 1, 2, and 3, except energy-adjusted log-transformed continuous dietary variables were used instead of five-level adjustment (90<sup>th</sup> percentile for unprocessed red meat: 47.6 g/d; for processed meat: 10.5 g/d; and for combined intake of red and processed meats: 50.4 g/d).

<sup>e</sup> Also adjusted for previous screening for colon, prostate, or breast cancers during the last four years.

<sup>f</sup> Model 3 here did not adjust for either unprocessed red meat or processed meat, but rather both were combined and used as one exposure variable.

**Table S5. The association between red and processed meat intake and all-cause, cardiovascular and cancer mortality among never smokers (N=58,774) <sup>a</sup>**

|                            | Unprocessed red meat intake (g/d) <sup>b</sup> |                                  |                  |                  |                  |         |                                    |
|----------------------------|------------------------------------------------|----------------------------------|------------------|------------------|------------------|---------|------------------------------------|
|                            | Zero intake                                    | Quartiles of intake <sup>c</sup> |                  |                  |                  | P-trend | 90 <sup>th</sup> vs 0 <sup>d</sup> |
|                            | 0                                              | Q1                               | Q2               | Q3               | Q4               |         |                                    |
| No. of participants        | 39,991                                         | 5,055                            | 4,878            | 4,551            | 4,299            |         |                                    |
| <b>All-cause mortality</b> |                                                |                                  |                  |                  |                  |         |                                    |
| No. of deaths (N=6268)     | 4,559                                          | 536                              | 451              | 374              | 348              |         |                                    |
| Model 1                    | 1.00                                           | 1.12 (1.02–1.24)                 | 1.19 (1.07–1.31) | 1.28 (1.15–1.43) | 1.54 (1.37–1.72) | <.0001  | 1.44 (1.32–1.56)                   |
| Model 2                    | 1.00                                           | 1.06 (0.96–1.18)                 | 1.11 (1.00–1.24) | 1.16 (1.02–1.31) | 1.34 (1.19–1.52) | <.0001  | 1.26 (1.14–1.39)                   |
| Model 3                    | 1.00                                           | 1.04 (0.93–1.16)                 | 1.06 (0.94–1.19) | 1.09 (0.95–1.25) | 1.22 (1.06–1.41) | .008    | 1.16 (1.02–1.31)                   |
| <b>CVD-mortality</b>       |                                                |                                  |                  |                  |                  |         |                                    |
| No. of deaths (N=2116)     | 1,550                                          | 189                              | 137              | 124              | 116              |         |                                    |
| Model 1                    | 1.00                                           | 1.20 (1.01–1.42)                 | 1.18 (0.99–1.42) | 1.32 (1.08–1.62) | 1.71 (1.41–2.07) | <.0001  | 1.55 (1.34–1.78)                   |
| Model 2                    | 1.00                                           | 1.15 (0.96–1.38)                 | 1.12 (0.93–1.35) | 1.20 (0.96–1.49) | 1.53 (1.24–1.89) | <.001   | 1.40 (1.18–1.65)                   |
| Model 3                    | 1.00                                           | 1.12 (0.92–1.36)                 | 1.06 (0.86–1.29) | 1.11 (0.87–1.43) | 1.39 (1.09–1.78) | .029    | 1.26 (1.02–1.56)                   |
| <b>Cancer mortality</b>    |                                                |                                  |                  |                  |                  |         |                                    |
| No. of deaths (N=1401)     | 1,008                                          | 117                              | 107              | 88               | 81               |         |                                    |
| Model 1                    | 1.00                                           | 1.04 (0.86–1.27)                 | 1.09 (0.89–1.35) | 1.18 (0.95–1.47) | 1.34 (1.07–1.69) | .006    | 1.27 (1.07–1.50)                   |
| Model 2 <sup>e</sup>       | 1.00                                           | 0.99 (0.81–1.22)                 | 1.03 (0.83–1.28) | 1.06 (0.94–1.35) | 1.17 (0.91–1.51) | .268    | 1.11 (0.91–1.35)                   |
| Model 3 <sup>e</sup>       | 1.00                                           | 0.97 (0.78–1.21)                 | 0.98 (0.77–1.25) | 1.00 (0.77–1.31) | 1.05 (0.79–1.42) | .708    | 0.99 (0.78–1.27)                   |
|                            | Processed meat intake (g/d) <sup>b</sup>       |                                  |                  |                  |                  |         |                                    |
|                            | Zero intake                                    | Quartiles of intake <sup>c</sup> |                  |                  |                  | P-trend | 90 <sup>th</sup> vs 0 <sup>d</sup> |
|                            | 0                                              | Q1                               | Q2               | Q3               | Q4               |         |                                    |
| No. of participants        | 41,023                                         | 4,454                            | 4,447            | 4,440            | 4,410            |         |                                    |
| <b>All-cause mortality</b> |                                                |                                  |                  |                  |                  |         |                                    |
| No. of deaths (N=6268)     | 4,645                                          | 477                              | 394              | 373              | 379              |         |                                    |
| Model 1                    | 1.00                                           | 1.06 (0.96–1.17)                 | 1.19 (1.07–1.32) | 1.24 (1.10–1.39) | 1.44 (1.29–1.62) | <.0001  | 1.40 (1.28–1.52)                   |
| Model 2                    | 1.00                                           | 1.02 (0.92–1.14)                 | 1.10 (0.98–1.23) | 1.13 (1.00–1.27) | 1.30 (1.15–1.47) | <.0001  | 1.24 (1.12–1.37)                   |
| Model 3                    | 1.00                                           | 0.99 (0.86–1.12)                 | 1.05 (0.92–1.20) | 1.05 (0.92–1.20) | 1.18 (1.03–1.35) | .033    | 1.13 (1.00–1.26)                   |

| <b>CVD–mortality</b>                                               |                          |                                        |                  |                  |                  |                |                                         |
|--------------------------------------------------------------------|--------------------------|----------------------------------------|------------------|------------------|------------------|----------------|-----------------------------------------|
| No. of deaths (N=2116)                                             | 1,570                    | 164                                    | 135              | 122              | 125              |                |                                         |
| Model 1                                                            | 1.00                     | 1.08 (0.90–1.29)                       | 1.22 (1.01–1.47) | 1.42 (1.16–1.74) | 1.43 (1.17–1.74) | <.0001         | 1.46 (1.26–1.70)                        |
| Model 2                                                            | 1.00                     | 1.03 (0.85–1.24)                       | 1.14 (0.93–1.39) | 1.32 (1.07–1.62) | 1.29 (1.04–1.59) | .001           | 1.32 (1.11–1.57)                        |
| Model 3                                                            | 1.00                     | 1.00 (0.81–1.23)                       | 1.07 (0.86–1.33) | 1.22 (0.97–1.52) | 1.13 (0.90–1.43) | .109           | 1.15 (0.94–1.41)                        |
| <b>Cancer mortality</b>                                            |                          |                                        |                  |                  |                  |                |                                         |
| No. of deaths (N=1401)                                             | 1,039                    | 94                                     | 94               | 85               | 89               |                |                                         |
| Model 1                                                            | 1.00                     | 0.90 (0.73–1.11)                       | 1.15 (0.92–1.43) | 1.07 (0.83–1.37) | 1.34 (1.03–1.72) | .030           | 1.29 (1.07–1.56)                        |
| Model 2 <sup>e</sup>                                               | 1.00                     | 0.86 (0.70–1.07)                       | 1.06 (0.85–1.33) | 0.97 (0.74–1.26) | 1.22 (0.93–1.60) | .343           | 1.16 (0.94–1.43)                        |
| Model 3 <sup>e</sup>                                               | 1.00                     | 0.83 (0.66–1.04)                       | 1.02 (0.80–1.30) | 0.92 (0.69–1.23) | 1.13 (0.84–1.52) | .752           | 1.10 (0.86–1.40)                        |
| <b>Combined intake of red and processed meat (g/d)<sup>b</sup></b> |                          |                                        |                  |                  |                  |                |                                         |
|                                                                    | <b>Zero intake<br/>0</b> | <b>Quartiles of intake<sup>c</sup></b> |                  |                  |                  | <b>P-trend</b> | <b>90<sup>th</sup> vs 0<sup>d</sup></b> |
|                                                                    | <b>Q1</b>                | <b>Q2</b>                              | <b>Q3</b>        | <b>Q4</b>        |                  |                |                                         |
| No. of participants                                                | 34,912                   | 5,965                                  | 5,966            | 5,965            | 5,966            |                |                                         |
| <b>All–cause mortality</b>                                         |                          |                                        |                  |                  |                  |                |                                         |
| No. of deaths (N=6268)                                             | 4,041                    | 620                                    | 613              | 504              | 490              |                |                                         |
| Model 1                                                            | 1.00                     | 1.06 (0.96–1.16)                       | 1.12 (1.02–1.22) | 1.23 (1.12–1.36) | 1.50 (1.36–1.65) | <.0001         | 1.44 (1.33–1.56)                        |
| Model 2                                                            | 1.00                     | 1.04 (0.95–1.15)                       | 1.06 (0.97–1.17) | 1.14 (1.02–1.26) | 1.31 (1.17–1.47) | <.0001         | 1.26 (1.15–1.39)                        |
| Model 3 <sup>f</sup>                                               | 1.00                     | 1.03 (0.93–1.14)                       | 1.04 (0.93–1.16) | 1.11 (0.98–1.25) | 1.27 (1.11–1.45) | .002           | 1.22 (1.08–1.37)                        |
| <b>CVD–mortality</b>                                               |                          |                                        |                  |                  |                  |                |                                         |
| No. of deaths (N=2116)                                             | 1,376                    | 210                                    | 216              | 158              | 156              |                |                                         |
| Model 1                                                            | 1.00                     | 1.04 (0.89–1.22)                       | 1.22 (1.05–1.41) | 1.27 (1.08–1.51) | 1.54 (1.30–1.84) | <.0001         | 1.52 (1.33–1.74)                        |
| Model 2                                                            | 1.00                     | 1.03 (0.87–1.21)                       | 1.17 (0.99–1.38) | 1.16 (0.97–1.39) | 1.38 (1.13–1.68) | <.001          | 1.40 (1.18–1.65)                        |
| Model 3 <sup>f</sup>                                               | 1.00                     | 1.02 (0.84–1.22)                       | 1.15 (0.95–1.38) | 1.12 (0.90–1.39) | 1.30 (1.03–1.66) | .032           | 1.34 (1.08–1.65)                        |
| <b>Cancer mortality</b>                                            |                          |                                        |                  |                  |                  |                |                                         |
| No. of deaths (N=1401)                                             | 899                      | 133                                    | 131              | 119              | 119              |                |                                         |
| Model 1                                                            | 1.00                     | 0.98 (0.80–1.21)                       | 1.01 (0.84–1.22) | 1.05 (0.84–1.32) | 1.39 (1.15–1.69) | .011           | 1.25 (1.06–1.47)                        |
| Model 2 <sup>e</sup>                                               | 1.00                     | 0.96 (0.78–1.19)                       | 0.95 (0.78–1.16) | 0.96 (0.76–1.23) | 1.21 (0.97–1.51) | .381           | 1.10 (0.90–1.33)                        |
| Model 3 <sup>e,f</sup>                                             | 1.00                     | 0.92 (0.73–1.16)                       | 0.90 (0.72–1.12) | 0.91 (0.69–1.20) | 1.12 (0.87–1.45) | .789           | 1.00 (0.78–1.27)                        |

<sup>a</sup> Data are given as hazard ratio (95% confidence interval).

<sup>b</sup> Values based on energy-adjusted variable.

<sup>c</sup> Quartiles based on percentiles of the energy-adjusted g/d intake among never-smoked participants. Median quartiles (g/d) are as follow: for unprocessed red meat, Q1=4, Q2=9, Q3=15.6, Q4=41.1; for processed meat, Q1=0.6, Q2=1.3, Q3=2.9, Q4=8; and for combined intake of red and processed meats, Q1=1.1, Q2=6.6, Q3=13.9, Q4=38.9.

**Model 1** adjusted for age (attained age as time variable), sex (male and female), race (black, nonblack), and total energy intake (continuous).

**Model 2** adjusted for age (attained age as time variable), sex (male and female), race (black and nonblack), total energy intake (continuous), marital status (married/common-law and single/widowed/divorced/separated), educational level (up to high school graduate, trade school/some college/associate degree, bachelor degree, and graduate degree), multivitamin use (current use), alcohol use (none, rarely, monthly, weekly, and daily), exercise (none,  $\leq 20$  min/wk, 21–60 min/wk, 61–150 min/wk, and  $\geq 151$  min/wk), and sleep ( $\leq 4$  h/night, 5–8 h/night, and  $\geq 9$  h/night), body mass index ( $< 18.5$ , 18.5–24.9, 25.0–29.9, or  $\geq 30.0$ ), aspirin use (used weekly for at least two years in the last five years), having been ever diagnosed with or received treatment in the last 12 months for diabetes, having been diagnosed in the last 5 years with or received treatment in the last 12 months for hypertension or hypercholesterolemia, the use of statin or blood pressure medications for at least 2 years in the last 5 years, and dietary variables (each variable has 5 levels in g/d) as following: cruciferous vegetables (Quintiles:  $< 9.6$ , 9.6–16.7,  $> 16.7$ –26.1,  $> 26.1$ –45.2,  $> 45.2$ ), fruits (Quintiles:  $< 130$ , 130–224.4,  $> 224.4$ –322,  $> 322$ –464.2,  $> 464.2$ ), whole grain (Quintiles:  $< 65$ , 65–109.9,  $> 109.9$ –170.3,  $> 170.3$ –252.2,  $> 252.2$ ), legumes (Quintiles:  $< 17$ , 17–29.7,  $> 29.7$ –45.9,  $> 45.9$ –77.1,  $> 77.1$ ), nuts and seeds (Quintiles:  $< 6.4$ , 6.4–12.8,  $> 12.8$ –21.6,  $> 21.6$ –35.1,  $> 35.1$ ), total dairy (0 intake, quartiles of intake:  $> 0$ –36,  $> 36$ –108.1,  $> 108.1$ –240.9,  $> 240.9$ ), eggs (0 intake, quartiles of intake:  $> 0$ –3.6,  $> 3.6$ –7.3,  $> 7.3$ –20.1,  $> 20.1$ ); and in women, the model also adjusted for menopausal status (premenopausal, postmenopausal), and hormone therapy (in postmenopausal women) (not taking hormone therapy, taking hormone therapy).

**Model 3:** In addition to covariates in model 2, also adjusted for other meat variables such as fish (0 intake, quartiles of intake:  $> 0$ –7,  $> 7$ –12.6,  $> 12.6$ –21.4,  $> 21.4$ ) and unprocessed poultry (0 intake, quartiles of intake:  $> 0$ –4.8,  $> 4.8$ –10.4,  $> 10.4$ –32.5,  $> 32.5$ ). Also, for model 3 in unprocessed red meat, processed meat was adjusted for (0 intake and quartiles of intake) and vice versa.

<sup>d</sup> Models in these analyses are correspondents to models 1, 2, and 3, except energy-adjusted log-transformed continuous dietary variables were used instead of five-level adjustment (90<sup>th</sup> percentile for unprocessed red meat: 43.9 g/d; for processed meat: 9.4 g/d; and for combined intake of red and processed meats: 44.6 g/d).

<sup>e</sup> Also adjusted for previous screening for colon, prostate, or breast cancers during the last four years.

<sup>f</sup> Model 3 here did not adjust for either unprocessed red meat or processed meat, but rather both were combined and used as one exposure variable



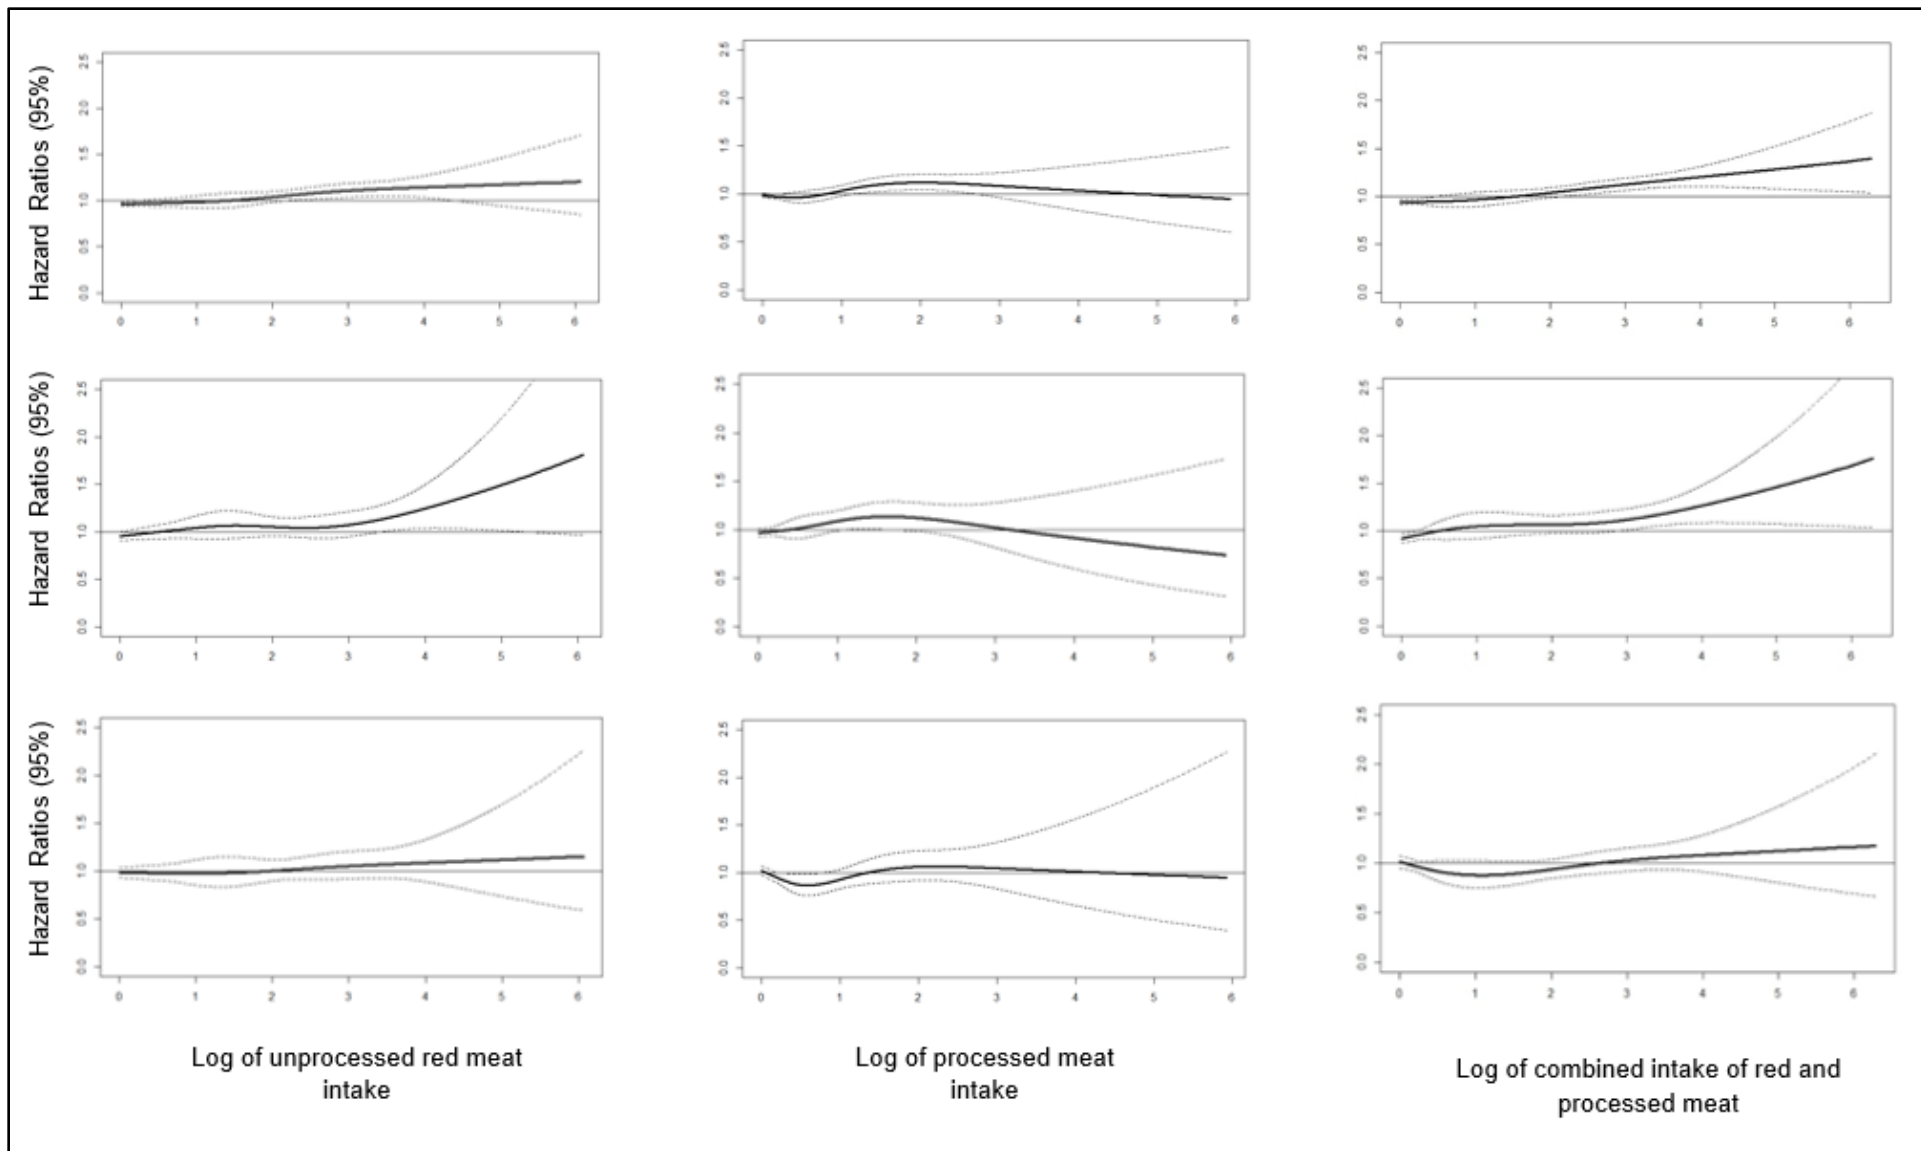

**Figure S1. Dose-response relationships of red and processed meats with the risk of all-cause (top row), CVD (middle row) and cancer (bottom row) mortality in the AHS-2 cohort.**

The spline models were adjusted for age (attained age as time variable); sex (male, female); race (blacks, non-blacks); marital status (married/common-law, single/widowed/divorced/separated); education level (up to high school graduate, trade school/some college/associate degree, bachelor degree, graduate degree); multivitamin use (current use, past or never used); smoking (current smoker, quit <1 year, quit 1–4 years, quit 5–9 years, quit 10–19 years, quit 20–29 years, quit ≥30 years, never smoked); alcohol use (none, rarely, monthly, weekly, daily); exercise (none, ≤20 min/week, 21–60 min/week, 61–150 min/week, ≥151 min/week); sleep (≤4 hours/night, 5–8 hours /night, ≥9 hours /night); body mass index (BMI) (<18.5, 18.5–24.9, 25.0–29.9, ≥30.0); diabetes mellitus (yes/no: having ever been diagnosed with or received treatment in the last 12 months for diabetes); hypertension (yes/no: having been diagnosed in the last 5 years with or received treatment in the last 12 months for hypertension); hypercholesterolemia (yes/no: having been diagnosed in the last 5 years with or received treatment in the last 12 months for hypercholesterolemia); aspirin use (yes/no: used weekly for at least two years

in the last five years); the use of blood pressure medications for at least 2 years in the last 5 years (yes/no); the use of statin for at least 2 years in the last 5 years (yes/no);— and in women, menopausal status among women (premenopausal, postmenopausal); hormone replacement therapy (HRT) among postmenopausal women (yes/no: taking HRT)—; dietary energy (continuous); and dietary variables (continuous) including cruciferous vegetables, fruits, whole grain, legumes, nuts and seeds, total dairy, eggs, fish, unprocessed poultry, and mutual adjustment of unprocessed red meat and processed meat. For combined intake of both unprocessed red and processed meats, both were summed together and used as one exposure variable.
